# Supplementary material
Source: PubMed Central journal article supplement (PMC1639517)
Supplement: rspb20063671s03.pdf [file rspb20063671s03.pdf]

Appendix 1. Avian hosts, geographical origin, frequency of detection and GenBank accession numbers for parasite mitochondrial (cyt *b*) lineages. GenBank numbers for sequences obtained from previously published data are in italics.

| lineage | host information |                     |                     |                            |                       | n  | length<br>(bp) | GenBank<br>no.  |
|---------|------------------|---------------------|---------------------|----------------------------|-----------------------|----|----------------|-----------------|
|         | family           | genus               | species             | common name                | locality <sup>a</sup> |    |                |                 |
| 1       | Fringillidae     | <i>Carpodacus</i>   | <i>mexicanus</i>    | House finch                | USA                   | 1  | 753            | DQ659538        |
| 1       | Parulidae        | <i>Seiurus</i>      | <i>aurocapillus</i> | Ovenbird                   | BER                   | 1  | 256            | DQ838987        |
| 1       | Passeridae       | <i>Passer</i>       | <i>domesticus</i>   | House sparrow              | USA                   | 4  | 533            | DQ838988        |
| 1       | Troglodytidae    | <i>Thryomanes</i>   | <i>bewickii</i>     | Bewick's wren              | USA                   | 1  | 533            | DQ838989        |
| 1       | Cardinalidae     | <i>Cardinalis</i>   | <i>cardinalis</i>   | Northern cardinal          | USA                   | 28 | 533            | DQ838990        |
| 1       | Emberizidae      | <i>Melospiza</i>    | <i>georgiana</i>    | Swamp sparrow              | USA                   | -  | 551            | <i>AY640130</i> |
| 1       | Hirundinidae     | <i>Tachycineta</i>  | <i>bicolor</i>      | Tree swallow               | USA                   | -  | 551            | <i>AY640130</i> |
| 2       | Icteridae        | <i>Molothrus</i>    | <i>ater</i>         | Brown-headed cowbird       | USA                   | 1  | 753            | DQ659539        |
| 2       | Fringillidae     | <i>Carpodacus</i>   | <i>mexicanus</i>    | House finch                | USA                   | 2  | 653            | DQ659540        |
| 3       | Fringillidae     | <i>Carpodacus</i>   | <i>mexicanus</i>    | House finch                | USA                   | 1  | 753            | DQ659541        |
| 4       | Parulidae        | <i>Geothlypis</i>   | <i>trichas</i>      | Common yellowthroat        | USA                   | 1  | 753            | <i>DQ659542</i> |
| 5       | Muscicapidae     | <i>Luscinia</i>     | <i>svecica</i>      | Bluethroat                 | NOR                   | 1  | 753            | DQ659543        |
| 5       | Phasianidae      | <i>Phasianus</i>    | <i>colchicus</i>    | Ring-necked pheasant       | KOR                   | 1  | 533            | DQ838991        |
| 5       | Motacillidae     | <i>Anthus</i>       | <i>hodgsoni</i>     | Olive-backed pipit         | KOR                   | 2  | 753            | DQ838992        |
| 5       | Corvidae         | <i>Corvus</i>       | <i>corone</i>       | Carrion crow               | JAP                   | 1  | 433            | DQ659544        |
| 6       | Icteridae        | <i>Icterus</i>      | <i>cayanensis</i>   | Epaulet oriole             | URU                   | 1  | 753            | DQ659545        |
| 6       | Emberizidae      | <i>Poospiza</i>     | <i>lateralis</i>    | Red-rumped warbling finch  | URU                   | 1  | 256            | DQ838993        |
| 6       | Emberizidae      | <i>Loxigilla</i>    | <i>noctis</i>       | Lesser Antillean bullfinch | DOM                   | -  | 312            | AF465558        |
| 6       | Troglodytidae    | <i>Troglodytes</i>  | <i>aedon</i>        | House wren                 | URU                   | 1  | 515            | DQ838994        |
| 7       | Parulidae        | <i>Icteria</i>      | <i>virens</i>       | Yellow-breasted chat       | USA                   | 2  | 753            | DQ659546        |
| 7       | Pachycephalidae  | <i>Eulacestoma</i>  | <i>nigropectus</i>  | Wattled ploughbill         | PNG                   | -  | 533            | <i>AY714201</i> |
| 8       | Parulidae        | <i>Icteria</i>      | <i>virens</i>       | Yellow-breasted chat       | USA                   | 2  | 753            | <i>DQ659547</i> |
| 9       | Muscicapidae     | <i>Cercotrichas</i> | <i>podobe</i>       | Black scrub-robin          | NIG                   | -  | 478            | AF495549        |
| 10      | Tyrannidae       | <i>Myiarchus</i>    | <i>tyrannulus</i>   | Brown-crested flycatcher   | USA                   | 1  | 753            | DQ659548        |
| 11      | Parulidae        | <i>Geothlypis</i>   | <i>trichas</i>      | Common yellowthroat        | USA                   | 1  | 753            | DQ659549        |
| 11      | Passeridae       | <i>Passer</i>       | <i>domesticus</i>   | House sparrow              | USA                   | -  | 533            | AF069611        |
| 11      | Icteridae        | <i>Gnorimopsar</i>  | <i>chopi</i>        | Chopi blackbird            | URU                   | 2  | 322            | DQ838995        |
| 11      | Turdidae         | <i>Turdus</i>       | <i>rufiventris</i>  | Rufous-bellied thrush      | URU                   | 1  | 313            | DQ838996        |
| 11      | Troglodytidae    | <i>Troglodytes</i>  | <i>aedon</i>        | House wren                 | URU                   | 3  | 753            | DQ838997        |

|    |                   |                       |                        |                             |                         |     |     |          |
|----|-------------------|-----------------------|------------------------|-----------------------------|-------------------------|-----|-----|----------|
| 11 | Icteridae         | <i>Pseudoleistes</i>  | <i>guirahuro</i>       | Yellow-rumped marshbird     | URU                     | 1   | 533 | DQ838998 |
| 11 | Thraupidae        | <i>Tangara</i>        | <i>preciosa</i>        | Chestnut-backed tanager     | URU                     | 1   | 533 | DQ838999 |
| 11 | Thraupidae        | <i>Stephanophorus</i> | <i>diadematus</i>      | Diademed tanager            | URU                     | 1   | 335 | DQ839000 |
| 12 | Emberizidae       | <i>Emberizoides</i>   | <i>herbicola</i>       | Wedge-tailed grass-finch    | GUY                     | 1   | 753 | DQ659550 |
| 12 | Icteridae         | <i>Sturnella</i>      | <i>militaris</i>       | Red-breasted blackbird      | GUY                     | 1   | 256 | DQ839001 |
| 13 | Icteridae         | <i>Sturnella</i>      | <i>supercilliaris</i>  | White-browed blackbird      | URU                     | 2   | 753 | DQ659551 |
| 14 | Turdidae          | <i>Alethe</i>         | <i>diademata</i>       | Fire-crested alethe         | GAB                     | 4   | 753 | DQ659552 |
| 15 | Drepanididae      | <i>Hemignathus</i>    | <i>virens</i>          | Hawaii amakihi              | HI                      | 12  | 753 | DQ659553 |
| 15 | Drepanididae      | <i>Hemignathus</i>    | <i>flavus</i>          | Oahu amakihi                | HI                      | 6   | 533 | DQ839002 |
| 15 | Drepanididae      | <i>Himatione</i>      | <i>sanguinea</i>       | Apapane                     | HI                      | 4   | 315 | DQ839003 |
| 15 | Drepanididae      | <i>Vestiaria</i>      | <i>coccinea</i>        | I'iwi                       | HI                      | 2   | 338 | DQ839004 |
| 15 | Emberizidae       | <i>Carpodacus</i>     | <i>mexicanus</i>       | House finch                 | HI                      | 2   | 351 | DQ839005 |
| 15 | Emberizidae       | <i>Loxigilla</i>      | <i>violacea</i>        | Greater Antillean bullfinch | DOM                     | 1   | 533 | DQ839006 |
| 15 | Estrildidae       | <i>Lonchura</i>       | <i>punctulata</i>      | Nutmeg mannikin             | HI                      | 1   | 351 | DQ839007 |
| 15 | Estrildidae       | <i>Lonchura</i>       | <i>malacca</i>         | Black-headed munia          | IND                     | 1   | 256 | DQ839008 |
| 15 | Estrildidae       | <i>Neochmia</i>       | <i>temporalis</i>      | Red-browed firetail         | FP                      | 2   | 753 | DQ839009 |
| 15 | Mimidae           | <i>Dumetella</i>      | <i>carolinensis</i>    | Grey catbird                | BER                     | 7   | 533 | DQ839010 |
| 15 | Mimidae           | <i>Mimus</i>          | <i>gilvus</i>          | Tropical mockingbird        | GRE                     | 1   | 533 | DQ839011 |
| 15 | Muscicapidae      | <i>Cercomela</i>      | <i>fusca</i>           | Indian chat                 | IND                     | 1   | 351 | DQ839012 |
| 15 | Muscicapidae      | <i>Humblotia</i>      | <i>flavirostris</i>    | Grand Comoro flycatcher     | GCO                     | 1   | 295 | DQ839013 |
| 15 | Muscicapidae      | <i>Luscinia</i>       | <i>svecica</i>         | Bluethroat                  | SWE                     | 5   | 478 | DQ839014 |
| 15 | Nectariniidae     | <i>Nectarinia</i>     | <i>humbloti</i>        | Humblot's sunbird           | GCO                     | 1   | 295 | DQ839015 |
| 15 | Nectariniidae     | <i>Nectarinia</i>     | <i>notata</i>          | Long-billed green sunbird   | GCO                     | 1   | 533 | DQ839016 |
| 15 | Nectariniidae     | <i>Cinnyris</i>       | <i>sovimanga</i>       | Souimanga sunbird           | MAD                     | 1   | 91  | DQ839017 |
| 15 | Paradoxornithidae | <i>Paradoxornis</i>   | <i>webbianus</i>       | Vinous-throated parrotbill  | KOR                     | 1   | 91  | DQ839018 |
| 15 | Passeridae        | <i>Passer</i>         | <i>domesticus</i>      | House sparrow               | BER, HI, IND            | 67  | 533 | DQ839019 |
| 15 | Ploceidae         | <i>Foudia</i>         | <i>madagascarensis</i> | Red fody                    | GCO, MAD, PRA           | 5   | 533 | DQ839020 |
| 15 | Ploceidae         | <i>Foudia</i>         | <i>eminentissima</i>   | Red-headed fody             | GCO                     | 2   | 533 | DQ839021 |
| 15 | Ploceidae         | <i>Foudia</i>         | <i>flavicans</i>       | Rodrigues fody              | ROD                     | 1   | 533 | DQ839022 |
| 15 | Ploceidae         | <i>Quelea</i>         | <i>quelea</i>          | Red-billed quelea           | SAF                     | 1   | 295 | DQ839023 |
| 15 | Sturnidae         | <i>Acridotheres</i>   | <i>tristis</i>         | Common myna                 | AUS, HI, IND, FP        | 19  | 533 | DQ839024 |
| 15 | Sturnidae         | <i>Sturnus</i>        | <i>vulgaris</i>        | European starling           | BER                     | 13  | 533 | DQ839025 |
| 15 | Sylviidae         | <i>Acrocephalus</i>   | <i>arundinaceus</i>    | Greet reed-warbler          | BEL,ISR,NIG,<br>SWE,UKR | 133 | 478 | DQ839026 |
| 15 | Sylviidae         | <i>Acrocephalus</i>   | <i>baeticatus</i>      | African reed-warbler        | NIG                     | 1   | 478 | DQ839027 |
| 15 | Sylviidae         | <i>Acrocephalus</i>   | <i>gracilirostris</i>  | Lesser swamp-warbler        | NIG                     | 1   | 478 | DQ839028 |
| 15 | Sylviidae         | <i>Acrocephalus</i>   | <i>schoenobaenus</i>   | Sedge warbler               | NIG                     | 1   | 478 | DQ839029 |

|    |               |                     |                       |                        |                  |    |     |          |
|----|---------------|---------------------|-----------------------|------------------------|------------------|----|-----|----------|
| 15 | Sylviidae     | <i>Acrocephalus</i> | <i>mendanae</i>       | Marquesan reed-warbler | FP               | 9  | 753 | DQ839030 |
| 15 | Sylviidae     | <i>Hippolais</i>    | <i>pallida</i>        | Olivaceous warbler     | NIG              | 1  | 478 | DQ839031 |
| 15 | Sylviidae     | <i>Megalurus</i>    | <i>palustris</i>      | Striated grassbird     | IND              | 1  | 351 | DQ839032 |
| 15 | Sylviidae     | <i>Orthotomus</i>   | <i>cuculatus</i>      | Common tailorbird      | IND              | 1  | 351 | DQ839033 |
| 15 | Timaliidae    | <i>Stachyris</i>    | <i>pyrrhops</i>       | Black-chinned babbler  | IND              | 1  | 351 | DQ839034 |
| 15 | Zosteropidae  | <i>Zosterops</i>    | <i>borbonicus</i>     | Mascarene white-eye    | MAU, REU         | 3  | 533 | DQ839035 |
| 15 | Zosteropidae  | <i>Zosterops</i>    | <i>mouroniensis</i>   | Comoro white-eye       | GCO              | 2  | 295 | DQ839036 |
| 15 | Zosteropidae  | <i>Zosterops</i>    | <i>maderaspatanus</i> | Madagascar white-eye   | GCO, MAD,<br>MAY | 5  | 533 | DQ839037 |
| 15 | Zosteropidae  | <i>Zosterops</i>    | <i>choloronothos</i>  | Mauritius white-eye    | MAU              | 1  | 121 | DQ839038 |
| 15 | Zosteropidae  | <i>Zosterops</i>    | <i>lateralis</i>      | Silvereye              | FP               | 1  | 351 | DQ839039 |
| 16 | Fringillidae  | <i>Linurgus</i>     | <i>olivaceus</i>      | Oriole finch           | BIO              | 1  | 753 | DQ659554 |
| 16 | Fringillidae  | <i>Serinus</i>      | <i>atrogularis</i>    | Black-throated canary  | SAF              | 2  | 753 | DQ839040 |
| 16 | Ploceidae     | <i>Ploceus</i>      | <i>velatus</i>        | African masked-weaver  | BOT, SAF         | 3  | 653 | DQ659555 |
| 16 | Ploceidae     | <i>Quelea</i>       | <i>quelea</i>         | Red-billed quelea      | SAF, ZIM         | 19 | 533 | DQ839041 |
| 16 | Ploceidae     | <i>Euplectes</i>    | <i>orix</i>           | Red bishop             | SAF              | 1  | 295 | DQ839042 |
| 16 | Cisticolidae  | <i>Cisticola</i>    | <i>fulvicapillus</i>  | Piping cisticola       | SAF              | 1  | 295 | DQ839043 |
| 16 | Sulidae       | <i>Sula</i>         | <i>capensis</i>       | Cape gannet            | SAF              | 1  | 533 | DQ659556 |
| 17 | Monarchidae   | <i>Myiagra</i>      | <i>alecto</i>         | Shining flycatcher     | PNG              | 2  | 753 | DQ659557 |
| 18 | Ploceidae     | <i>Ploceus</i>      | <i>velatus</i>        | African masked weaver  | SAF              | 1  | 753 | DQ659558 |
| 18 | Ploceidae     | <i>Quelea</i>       | <i>quelea</i>         | Red-billed quelea      | BOT, SAF, ZIM    | 15 | 533 | DQ839044 |
| 19 | Ploceidae     | <i>Quelea</i>       | <i>quelea</i>         | Red-billed quelea      | BOT              | 1  | 351 | DQ659559 |
| 20 | Nectariniidae | <i>Cinnyris</i>     | <i>coquerellii</i>    | Mayotte sunbird        | MAY              | 3  | 753 | DQ659560 |
| 20 | Nectariniidae | <i>Cinnyris</i>     | <i>sovimanga</i>      | Souimanga sunbird      | MAD              | 1  | 533 | DQ839045 |
| 21 | Ploceidae     | <i>Foudia</i>       | <i>seychellarum</i>   | Seychelles Fody        | FRE              | 1  | 753 | DQ659561 |
| 21 | Nectariniidae | <i>Cinnyris</i>     | <i>dussumieri</i>     | Seychelles sunbird     | FRE              | 1  | 533 | DQ839046 |
| 22 | Sylviidae     | <i>Acrocephalus</i> | <i>arundinaceus</i>   | Great reed warbler     | SWE              | 1  | 753 | DQ659562 |
| 22 | Sylviidae     | <i>Sylvia</i>       | <i>atricapilla</i>    | Blackcap               | SPA              | -  | 478 | AF495571 |
| 22 | Passeridae    | <i>Passer</i>       | <i>luteus</i>         | Sudan golden-sparrow   | NIG              | -  | 478 | AF495571 |
| 22 | Fringillidae  | <i>Carduelis</i>    | <i>chloris</i>        | European greenfinch    | UKR              | 1  | 456 | DQ659563 |
| 22 | Paridae       | <i>Parus</i>        | <i>major</i>          | Great tit              | KOR              | 1  | 351 | DQ839047 |
| 22 | Paridae       | <i>Sittiparus</i>   | <i>varius</i>         | Varied tit             | KOR              | 1  | 256 | DQ839048 |
| 22 | Corvidae      | <i>Garrulus</i>     | <i>glandarius</i>     | Eurasian jay           | KOR              | 1  | 753 | DQ839049 |
| 22 | Sturnidae     | <i>Acridotheres</i> | <i>tristis</i>        | Common myna            | IND, NZ          | 3  | 256 | DQ839050 |
| 23 | Passeridae    | <i>Passer</i>       | <i>melanurus</i>      | Mossie                 | SAF              | 1  | 753 | DQ659564 |
| 24 | Motacillidae  | <i>Motacilla</i>    | <i>alba</i>           | White wagtail          | KOR              | 1  | 753 | DQ659565 |
| 24 | Sylviidae     | <i>Acrocephalus</i> | <i>orientalis</i>     | Oriental reed warbler  | KOR              | 1  | 256 | DQ839051 |

|    |                   |                      |                         |                                |                  |   |     |          |
|----|-------------------|----------------------|-------------------------|--------------------------------|------------------|---|-----|----------|
| 25 | Ploceidae         | <i>Quelea</i>        | <i>quelea</i>           | Red-billed quelea              | SAF              | 1 | 753 | DQ659566 |
| 26 | Zosteropidae      | <i>Zosterops</i>     | <i>senegalensis</i>     | African yellow white-eye       | SAF              | 1 | 753 | DQ659567 |
| 27 | Nectariniidae     | <i>Cyanomitra</i>    | <i>oritis</i>           | Cameroon sunbird               | BIO              | 1 | 753 | DQ659568 |
| 27 | Ploceidae         | <i>Ploceus</i>       | <i>melanogaster</i>     | Black-billed weaver            | BIO              | 1 | 517 | DQ839052 |
| 28 | Alaudidae         | <i>Alauda</i>        | <i>arvensis</i>         | Sky lark                       | KOR              | 1 | 753 | DQ659569 |
| 28 | Paridae           | <i>Parus</i>         | <i>major</i>            | Great tit                      | KOR              | 2 | 256 | DQ839053 |
| 29 | Nectariniidae     | <i>Cyanomitra</i>    | <i>olivacea</i>         | Olive sunbird                  | GAB, CAM, PRI    | 6 | 753 | DQ659570 |
| 29 | Nectariniidae     | <i>Cinnyris</i>      | <i>chloropygius</i>     | Olive-bellied sunbird          | GAB              | 3 | 533 | DQ839054 |
| 30 | Ploceidae         | <i>Ploceus</i>       | <i>nigerrimus</i>       | Vieillot's weaver              | GAB              | 1 | 753 | DQ659571 |
| 30 | Ploceidae         | <i>Ploceus</i>       | <i>nigricollis</i>      | Black-necked weaver            | GAB              | 1 | 533 | DQ839055 |
| 30 | Muscicapidae      | <i>Copsychus</i>     | <i>malabaricus</i>      | White-rumped shama             | BUR              | 1 | 533 | DQ839056 |
| 30 | Muscicapidae      | <i>Copsychus</i>     | <i>saularis</i>         | Oriental magpie-robin          | BUR              | 1 | 533 | DQ839057 |
| 30 | Estrildidae       | <i>Lonchura</i>      | <i>punctulata</i>       | Nutmeg manikin                 | IND              | 1 | 351 | DQ839058 |
| 30 | Monarchidae       | <i>Hypothymis</i>    | <i>azurrea</i>          | Black-naped monarch            | BUR              | 1 | 295 | DQ839059 |
| 31 | Ploceidae         | <i>Foudia</i>        | <i>madagascariensis</i> | Red fody                       | MAD, MAY,<br>MAU | 5 | 753 | DQ659572 |
| 31 | Ploceidae         | <i>Ploceus</i>       | <i>grandis</i>          | Giant weaver                   | SAO              | 2 | 533 | DQ839060 |
| 31 | Ploceidae         | <i>Ploceus</i>       | <i>princeps</i>         | Principe golden-weaver         | PRI              | 1 | 491 | DQ839061 |
| 32 | Rhipiduridae      | <i>Rhipidura</i>     | <i>rufifrons</i>        | Rufous fantail                 | MAR              | 2 | 753 | DQ659573 |
| 33 | Monarchidae       | <i>Monarcha</i>      | <i>kaupi</i>            | Pied monarch                   | AUS              | 3 | 753 | DQ659574 |
| 33 | Monarchidae       | <i>Monarcha</i>      | <i>trivirgatus</i>      | Spectacled monarch             | AUS              | 3 | 533 | AY714199 |
| 33 | Petroicidae       | <i>Heteromyias</i>   | <i>albispecularis</i>   | Grey-headed robin              | AUS              | 1 | 533 | AY714199 |
| 34 | Ploceidae         | <i>Ploceus</i>       | <i>princeps</i>         | Principe golden-weaver         | PRI              | 1 | 753 | DQ659575 |
| 34 | Nectariniidae     | <i>Hedydipna</i>     | <i>collaris</i>         | Collared sunbird               | GAB              | 1 | 533 | DQ839062 |
| 34 | Nectariniidae     | <i>Hedydipna</i>     | <i>platura</i>          | Pygmy sunbird                  | NIG              | - | 478 | AF495566 |
| 34 | Sturnidae         | <i>Lamprotornis</i>  | <i>splendidus</i>       | Splendid glossy-starling       | PRI              | 1 | 518 | DQ839063 |
| 35 | Muscicapidae      | <i>Fraseria</i>      | <i>cinerascens</i>      | White-browed forest flycatcher | GAB              | 1 | 753 | DQ659576 |
| 36 | Nectariniidae     | <i>Cinnyris</i>      | <i>chloropygius</i>     | Olive-bellied sunbird          | CAM              | 1 | 533 | DQ659577 |
| 37 | Sylviidae         | <i>Phylloscopus</i>  | <i>trochilus</i>        | Willow warbler                 | SWE              | 1 | 753 | DQ659578 |
| 38 | Nectariniidae     | <i>Cyanomitra</i>    | <i>olivacea</i>         | Olive sunbird                  | GAB              | 1 | 753 | DQ659579 |
| 39 | Ptilonorhynchidae | <i>Scenopoeetes</i>  | <i>dentirostris</i>     | Tooth-billed bowerbird         | AUS              | 3 | 753 | DQ659580 |
| 39 | Ptilonorhynchidae | <i>Ailuroedus</i>    | <i>melanotis</i>        | Spotted catbird                | AUS              | 2 | 533 | AY714205 |
| 39 | Acanthizidae      | <i>Sericornis</i>    | <i>magnirostris</i>     | Large-billed scrubwren         | AUS              | 2 | 533 | AY714205 |
| 39 | Meliphagidae      | <i>Lichenostomus</i> | <i>frenatus</i>         | Bridled honeyeater             | AUS              | 1 | 533 | AY714205 |
| 39 | Monarchidae       | <i>Monarcha</i>      | <i>trivirgatus</i>      | Spectacled monarch             | AUS              | 1 | 533 | AY714205 |
| 39 | Pachycephalidae   | <i>Colluricincla</i> | <i>boweri</i>           | Bower's shrike-thrush          | AUS              | 1 | 533 | AY714205 |

|    |               |                     |                      |                           |     |   |     |          |
|----|---------------|---------------------|----------------------|---------------------------|-----|---|-----|----------|
| 40 | Aegithinidae  | <i>Aegithina</i>    | <i>tiphia</i>        | Common iora               | BUR | 2 | 753 | DQ659581 |
| 41 | Turdidae      | <i>Turdus</i>       | <i>migratorius</i>   | American robin            | USA | - | 753 | AY099033 |
| 42 | Emberizidae   | <i>Emberiza</i>     | <i>rutila</i>        | Chestnut bunting          | KOR | 1 | 753 | DQ659582 |
| 42 | Emberizidae   | <i>Emberiza</i>     | <i>spodocephala</i>  | Black-faced bunting       | KOR | 2 | 533 | DQ839064 |
| 43 | Charadriidae  | <i>Pluvialis</i>    | <i>fulva</i>         | Pacific Golden Plover     | HI  | 1 | 753 | DQ659583 |
| 43 | Fringillidae  | <i>Carpodacus</i>   | <i>erythrinus</i>    | Common rosefinch          | KOR | 1 | 753 | DQ839065 |
| 43 | Paridae       | <i>Parus</i>        | <i>major</i>         | Great tit                 | SWE | - | 413 | AF254978 |
| 44 | Paridae       | <i>Parus</i>        | <i>major</i>         | Great tit                 | SWE | - | 447 | AF495564 |
| 45 | Turdidae      | <i>Turdus</i>       | <i>philomelos</i>    | Song thrush               | SWE | - | 472 | AF495576 |
| 46 | Cisticolidae  | <i>Camaroptera</i>  | <i>brachyura</i>     | Green-backed camaroptera  | GAB | 1 | 753 | DQ659584 |
| 46 | Dicruridae    | <i>Dicrurus</i>     | <i>adsimilis</i>     | Fork-tailed drongo        | GAB | 1 | 334 | DQ839066 |
| 46 | Estrildidae   | <i>Pyrenestes</i>   | <i>ostrinus</i>      | Black-bellied seedcracker | GAB | 1 | 335 | DQ839067 |
| 46 | Estrildidae   | <i>Estrilda</i>     | <i>astrild</i>       | Common waxbill            | TAN | 1 | 533 | DQ839068 |
| 46 | Estrildidae   | <i>Spermophaga</i>  | <i>haematina</i>     | Western bluebill          | GAB | 1 | 334 | DQ839069 |
| 46 | Muscicapidae  | <i>Cossypha</i>     | <i>niveicapilla</i>  | Snowy-crowned robin-chat  | GAB | 1 | 333 | DQ839070 |
| 46 | Muscicapidae  | <i>Muscicapa</i>    | <i>olivascens</i>    | Olivaceous flycatcher     | GAB | 1 | 533 | DQ839071 |
| 46 | Muscicapidae  | <i>Stiphornis</i>   | <i>erythrothorax</i> | Forest robin              | GAB | 2 | 533 | DQ839072 |
| 46 | Nectariniidae | <i>Chalcomitra</i>  | <i>rubescens</i>     | Green-throated sunbird    | GAB | 1 | 334 | DQ839073 |
| 46 | Nectariniidae | <i>Cyanomitra</i>   | <i>olivacea</i>      | Olive sunbird             | GAB | 1 | 334 | DQ839074 |
| 46 | Nectariniidae | <i>Hedydipna</i>    | <i>collaris</i>      | Collared sunbird          | GAB | 1 | 533 | DQ839075 |
| 46 | Ploceidae     | <i>Malimbus</i>     | <i>nitens</i>        | Grey's malimbe            | GAB | 1 | 334 | DQ839076 |
| 46 | Ploceidae     | <i>Ploceus</i>      | <i>cucullatus</i>    | Village weaver            | GAB | 1 | 503 | DQ839077 |
| 46 | Pycnonotidae  | <i>Andropadus</i>   | <i>gracilis</i>      | Grey greenbul             | GAB | 1 | 533 | DQ839078 |
| 46 | Pycnonotidae  | <i>Andropadus</i>   | <i>virens</i>        | Little greenbul           | CAM | 2 | 533 | DQ839079 |
| 46 | Pycnonotidae  | <i>Bleda</i>        | <i>notata</i>        | Lesser bristlebill        | GAB | 1 | 334 | DQ839080 |
| 46 | Pycnonotidae  | <i>Bleda</i>        | <i>syndactyla</i>    | Common bristlebill        | GAB | 2 | 334 | DQ839081 |
| 46 | Pycnonotidae  | <i>Criniger</i>     | <i>calurus</i>       | Red-tailed greenbul       | GAB | 1 | 533 | DQ839082 |
| 46 | Pycnonotidae  | <i>Criniger</i>     | <i>chloronotus</i>   | Eastern bearded greenbul  | GAB | 1 | 334 | DQ839083 |
| 46 | Pycnonotidae  | <i>Nicator</i>      | <i>chloris</i>       | Yellow-spotted nicator    | GAB | 1 | 315 | DQ839084 |
| 46 | Rhipiduridae  | <i>Rhipidura</i>    | <i>rufifrons</i>     | Rufous fantail            | MAR | 2 | 753 | DQ839085 |
| 46 | Turdidae      | <i>Alethe</i>       | <i>poliocephala</i>  | Brown-chested alethe      | GAB | 4 | 533 | DQ839086 |
| 46 | Turdidae      | <i>Neocossyphus</i> | <i>fraseri</i>       | Rufous thrush             | GAB | 4 | 533 | DQ839087 |
| 46 | Turdidae      | <i>Neocossyphus</i> | <i>poensis</i>       | White-tailed ant-thrush   | GAB | 2 | 334 | DQ839088 |
| 46 | Turdidae      | <i>Neocossyphus</i> | <i>rufus</i>         | Red-tailed ant-thrush     | GAB | 1 | 533 | DQ839089 |
| 46 | Turdidae      | <i>Zoothera</i>     | <i>cameronensis</i>  | Black-eared ground-thrush | GAB | 1 | 533 | DQ839090 |
| 46 | Turdidae      | <i>Cyanomitra</i>   | <i>olivacea</i>      | Olive sunbird             | GAB | 1 | 533 | DQ839091 |
| 47 | Timaliidae    | <i>Pomatorhinus</i> | <i>ferruginosus</i>  | Coral-billed scimitar-    | BUR | 1 | 753 | DQ659585 |

|    |               |                     |                     |                          |     |   |     |          |
|----|---------------|---------------------|---------------------|--------------------------|-----|---|-----|----------|
|    |               |                     |                     | babbler                  |     |   |     |          |
| 47 | Timaliidae    | <i>Alcippe</i>      | <i>morrisonia</i>   | Grey-cheeked fulvetta    | BUR | 1 | 295 | DQ839092 |
| 47 | Muscicapidae  | <i>Cinclidium</i>   | <i>leucurum</i>     | White-tailed robin       | BUR | 1 | 533 | DQ839093 |
| 48 | Muscicapidae  | <i>Niltava</i>      | <i>sundara</i>      | Rufous-bellied niltava   | BUR | 1 | 533 | DQ659586 |
| 49 | Nectariniidae | <i>Cyanomitra</i>   | <i>olivacea</i>     | Olive sunbird            | GAB | 1 | 533 | DQ659587 |
| 50 | Icteridae     | <i>Quiscalus</i>    | <i>quiscula</i>     | Common grackle           | USA | - | 753 | AY099031 |
| 50 | n/a           | <i>n/a</i>          | <i>n/a</i>          | n/a                      | VIE | - | 753 | AY099029 |
| 51 | Strigidae     | <i>Ninox</i>        | <i>scutulata</i>    | Brown hawk-owl           | SIN | - | 753 | AY099035 |
| 52 | Ardeidae      | <i>Ardea</i>        | <i>herodias</i>     | Great blue heron         | USA | 1 | 753 | DQ659588 |
| 53 | Columbidae    | <i>Zenaida</i>      | <i>macroura</i>     | Mourning dove            | USA | - | 753 | AY099032 |
| 53 | Spheniscidae  | <i>Spheniscus</i>   | <i>demursus</i>     | African penguin          | SAF | 1 | 335 | DQ659589 |
| 54 | Paridae       | <i>Parus</i>        | <i>major</i>        | Great tit                | SWE | 1 | 753 | DQ659590 |
| 55 | n/a           | <i>n/a</i>          | <i>n/a</i>          | n/a                      | n/a | - | 478 | AY178904 |
| 56 | Sylviidae     | <i>Acrocephalus</i> | <i>arundinaceus</i> | Great reed warbler       | SWE | 1 | 753 | DQ659591 |
| 57 | Sylviidae     | <i>Acrocephalus</i> | <i>arundinaceus</i> | Great reed warbler       | SWE | - | 753 | AY099040 |
| 58 | Paridae       | <i>Cyanistes</i>    | <i>caeruleus</i>    | Blue tit                 | SWE | - | 753 | AY099045 |
| 59 | Alcedinidae   | <i>Alcedo</i>       | <i>leucogaster</i>  | White-bellied kingfisher | GAB | 1 | 753 | DQ659592 |

<sup>a</sup>AUS, Australia; BER, Bermuda; BEL, Belarus; BIO, Bioko; BOT, Botswana; BUR, Burma; CAM, Cameroon; DOM, Dominican Republic; FRE, Fregate; FP, French Polynesia; GAB, Gabon; GCO, Grand Comore; GRE, Grenada; GUY, Guyana; HI, Hawaii; IND, India; ISR, Israel; KOR, Korea; MAD, Madagascar; MAU, Mauritius; MAR, Marianas; MAY, Mayotte; NIG, Nigeria; NOR, Norway; NZ, New Zealand; PNG, Papua New Guinea; PRA, Praslin; PRI, Principe; REU, Reunion; ROD, Rodrigues Island; SAF, South Africa; SAO, Sao Tome; SIN, Singapore; SWE, Sweden; TAN, Tanzania; UKR, Ukraine; URU, Uruguay; USA, United States; VIE, Vietnam; ZIM, Zimbabwe

Appendix 2. Avian hosts, geographical origin, frequency of detection, associated mitochondrial lineage and GenBank accession numbers for DHFR-TS haplotypes shown in figure 3. DHFR-TS did not amplify from all samples for which a mitochondrial lineage was recovered.

| lineage | host                        | location <sup>a</sup> | n | associated mtDNA lineage | GenBank no. |
|---------|-----------------------------|-----------------------|---|--------------------------|-------------|
| A       | Yellow-breasted chat        | USA                   | 2 | 7                        | DQ659597    |
| A       | Yellow-breasted chat        | USA                   | 3 | 8                        | DQ659597    |
| B       | House finch                 | USA                   | 1 | 1                        | DQ659598    |
| B       | Brown-headed cowbird        | USA                   | 1 | 2                        | DQ839094    |
| B       | Bluethroat                  | NOR                   | 1 | 5                        | DQ839095    |
| B       | Carrion crow                | JAP                   | 1 | 5                        | DQ839096    |
| B       | Olive-backed pipit          | KOR                   | 2 | 5                        | DQ839097    |
| B       | Ring-necked pheasant        | KOR                   | 1 | 5                        | DQ839098    |
| B       | Epaulet oriole              | URU                   | 1 | 6                        | DQ839099    |
| B       | Red-rumped warbling finch   | URU                   | 1 | 6                        | DQ839100    |
| B       | House wren                  | URU                   | 1 | 6                        | DQ839101    |
| C       | Northern cardinal           | USA                   | 2 | 1                        | DQ659599    |
| D       | Chestnut-backed tanager     | URU                   | 1 | 11                       | DQ659600    |
| D       | Wedge-tailed grass-finch    | GUY                   | 1 | 12                       | DQ839102    |
| E       | White-browed blackbird      | URU                   | 1 | 13                       | DQ659601    |
| F       | Fire-crested alethe         | GAB                   | 2 | 14                       | DQ659602    |
| G       | Hawaii amakihi              | HI                    | 4 | 15                       | DQ659603    |
| G       | Gray catbird                | BER                   | 4 | 15                       | DQ839103    |
| G       | Greater Antillean bullfinch | DOM                   | 1 | 15                       | DQ839104    |
| G       | Red-browed firetail         | FP                    | 2 | 15                       | DQ839105    |
| G       | Marquesan reed-warbler      | FP                    | 2 | 15                       | DQ839106    |
| G       | European starling           | BER                   | 4 | 15                       | DQ839107    |
| G       | House sparrow               | BER, HI               | 7 | 15                       | DQ839108    |

|   |                                     |          |   |    |          |
|---|-------------------------------------|----------|---|----|----------|
| G | Iiwi                                | HI       | 2 | 15 | DQ839109 |
| G | Oahu amakihi                        | HI       | 1 | 15 | DQ839110 |
| G | Shining flycatcher                  | PNG      | 1 | 17 | DQ839111 |
| G | African masked weaver               | SAF      | 1 | 18 | DQ839112 |
| G | Red-billed quelea                   | SAF      | 1 | 18 | DQ839113 |
| G | African masked weaver               | SAF      | 1 | 16 | DQ839112 |
| G | Oriole finch                        | BIO      | 1 | 16 | DQ839114 |
| G | Black-billed weaver                 | BIO      | 1 | 27 | DQ839115 |
| G | Sky lark                            | KOR      | 1 | 28 | DQ839116 |
| G | Rufous fantail                      | MAR      | 2 | 32 | DQ839117 |
| G | Spectacled monarch                  | AUS      | 2 | 33 | DQ839118 |
| H | Madagascar white-eye                | GCO, MAD | 4 | 15 | DQ659604 |
| I | Black-naped monarch                 | BUR      | 1 | 30 | DQ659605 |
| J | Red fody                            | MAD, MAY | 2 | 31 | DQ659606 |
| K | White-rumped shama                  | BUR      | 1 | 30 | DQ659607 |
| L | Collared sunbird                    | GAB      | 1 | 34 | DQ659608 |
| M | Vieillot's weaver                   | GAB      | 1 | 30 | DQ659609 |
| M | Giant weaver                        | SAO      | 1 | 31 | DQ839119 |
| M | Principe golden-weaver              | PRI      | 1 | 31 | DQ839120 |
| N | Eurasian jay                        | KOR      | 1 | 22 | DQ659610 |
| N | Great tit                           | KOR      | 1 | 22 | DQ839121 |
| N | White wagtail                       | KOR      | 1 | 24 | DQ839122 |
| N | Blackcap                            | SPA      | 1 | 22 | AY560372 |
| O | Mossie                              | SAF      | 1 | 23 | DQ659611 |
| P | Olive sunbird                       | GAB      | 1 | 38 | DQ659612 |
| Q | n/a – <i>Plasmodium gallinaceum</i> | n/a      | - | -  | AY033582 |
| R | Bower's shrike thrush               | AUS      | 1 | 39 | DQ659613 |
| R | Bridled honeyeater                  | AUS      | 1 | 39 | DQ839123 |
| R | Spotted catbird                     | AUS      | 1 | 39 | DQ839124 |
| S | Common iora                         | BUR      | 1 | 40 | DQ659614 |
| T | Black-eared ground thrush           | GAB      | 1 | 46 | DQ659615 |

|   |                     |     |   |    |          |
|---|---------------------|-----|---|----|----------|
| T | Little greenbul     | CAM | 1 | 46 | DQ839125 |
| T | Rufous fantail      | MAR | 2 | 46 | DQ839126 |
| U | Common rosefinch    | KOR | 1 | 43 | DQ659616 |
| U | Black-faced bunting | KOR | 2 | 42 | DQ839127 |
| U | Chestnut bunting    | KOR | 1 | 42 | DQ839128 |
| V | Mourning dove       | USA | 1 | 53 | DQ659617 |
| W | Great reed-warbler  | SWE | - | 56 | AY560373 |
| X | Blue tit            | SWE | - | 58 | AY560369 |

---

<sup>a</sup>AUS, Australia; BER, Bermuda; BIO, Bioko; BUR, Burma; CAM, Cameroon; DOM, Dominican Republic; FP, French Polynesia; GAB, Gabon; GCO, Grand Comore; GUY, Guyana; HI, Hawaii; JAP, Japan; KEN, Kenya; KOR, Korea; MAD, Madagascar; MAR, Marianas; MAY, Mayotte; NOR, Norway; PNG, Papua New Guinea; PRI, Principe; SAF, South Africa; SAO, Sao Tome; URU, Uruguay; USA, United States
